# Supplementary material for: Flexible electrode of Fe-doped NiSe2@porous graphene as binder-free anode for lithium-ion batteries
Source: Royal Society of Chemistry journal article supplement (doi:10.1039/d3se01214j), 2024-01-01
Supplement: d3se01214j1.pdf [file d3se01214j1.pdf]

## Supplementary Information

### Flexible Electrode of Fe-doped NiSe<sub>2</sub>@Porous Graphene as binder-free anode for Lithium-Ion Batteries

Caiyun Guo<sup>a</sup>, Bo Zhang<sup>b</sup>, Mengru Xiao<sup>a</sup>, Mingming Hao<sup>a</sup>, Liting Zhao<sup>a</sup>, Xiaoting Zhang<sup>\*a</sup>, Hongyan Zhang<sup>\*a</sup> and Rui Wang<sup>\*a</sup>

<sup>a</sup>Beijing Key Laboratory of Clothing Materials R & D and Assessment, Beijing Engineering Research Center of Textile Nanofiber, School of Materials Design & Engineering, Beijing Institute of Fashion Technology, Beijing 100029, China.

<sup>b</sup>Heavy Oil Processing Department, PetroChina Petrochemical Research Institute, Beijing, 102206, China

\* Corresponding author. E-mail: zhangxt@bift.edu.cn, zhyzz@bift.edu.cn, clywangrui@bift.edu.cn

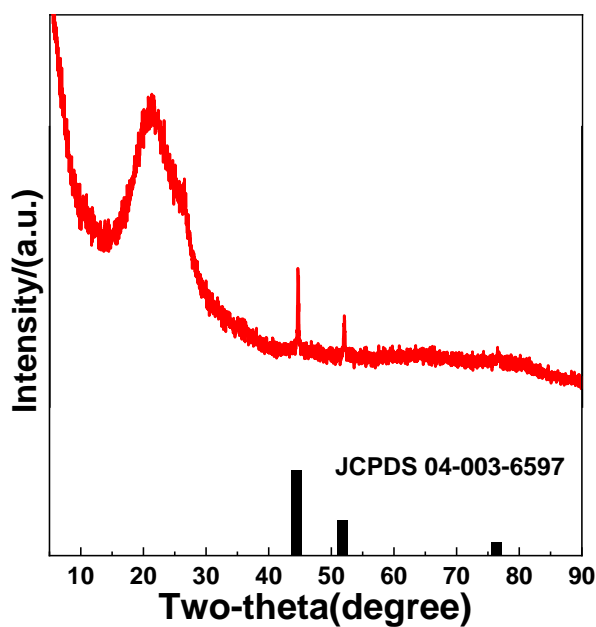

Fig. S1 XRD patterns of Ni@PG.

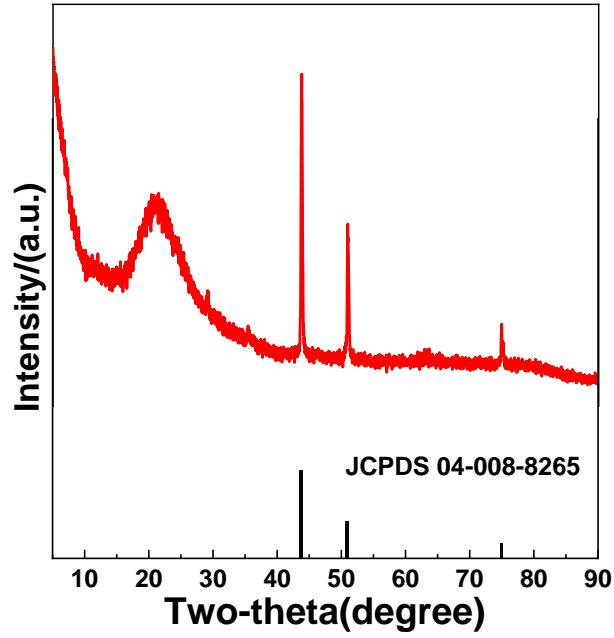

**Fig. S2** XRD patterns of FeNi@PG.

**Table S1** The electrolyte resistance, SEI film resistance, and charge-transfer resistance of NiSe<sub>2</sub>@PG and Fe-NiSe<sub>2</sub>@PG.

|                                | NiSe <sub>2</sub> @PG | Fe-NiSe <sub>2</sub> @PG |
|--------------------------------|-----------------------|--------------------------|
| The electrolyte resistance     | 1.5                   | 1.562                    |
| The SEI film resistance        | 16.33                 | 9.504                    |
| The charge-transfer resistance | 106                   | 44.64                    |
